# Supplementary material for: Tunable 3D hierarchical graphene–BiOI nanoarchitectures: their in situ preparation, and highly improved photocatalytic performance and photoelectrochemical properties under visible light irradiation
Source: Royal Society of Chemistry journal article supplement (doi:10.1039/c4ra07533a), 2014-01-01
Supplement: c4ra07533a1.pdf [file c4ra07533a1.pdf]

Electronic Supplementary Information

**Tunable 3D hierarchical graphene/BiOI nanoarchitectures:  
*in situ* preparation and highly improved photocatalytic  
performance and photoelectrochemical properties under  
visible light irradiation**

**Hongwei Huang,\* Kun Liu, Yinglei Zhang, Kai Chen, Yihe Zhang,\* Na Tian**

*Beijing Key Laboratory of Minerals Materials and Utilization of Solid Waste, School of Materials*

*Science and Technology, China University of Geosciences, Beijing 100083, China.*

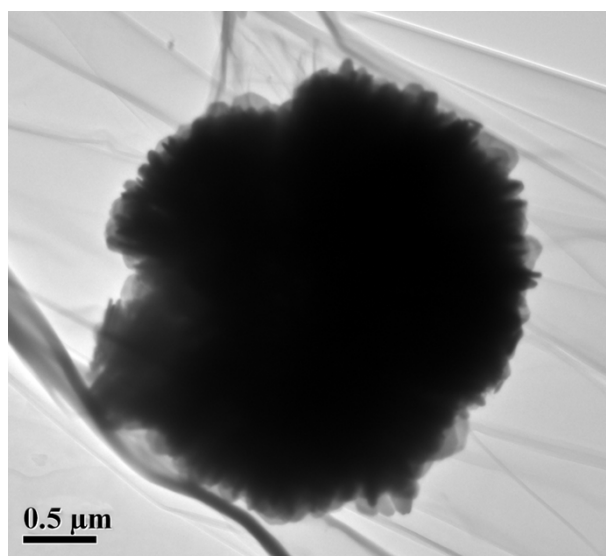

**Fig. S1** The TEM image of 5% graphene oxide/BiOI nanocomposite before hydrothermal treatment.

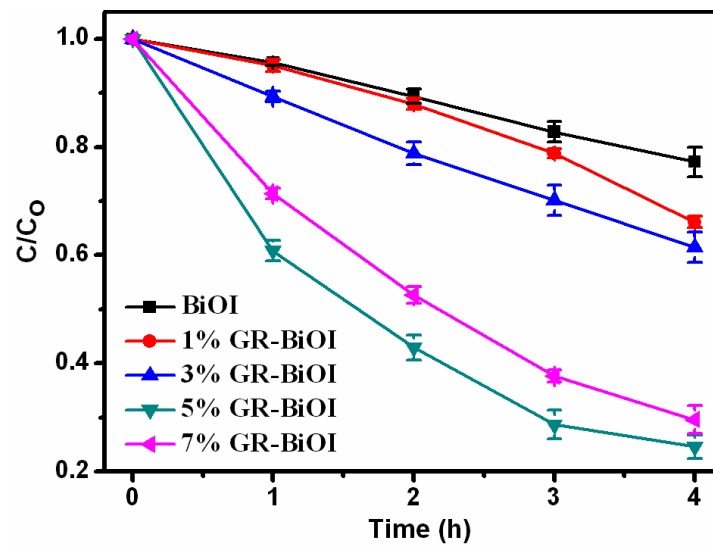

**Fig. S2** Photocatalytic degradation curves of RhB with error bars over pure BiOI, 1%, 3%, 5% and 7% GR-BiOI composites under the irradiation of visible light ( $\lambda > 420$  nm).
